# Supplementary material
Source: Elsevier journal article supplement (https://comptes-rendus.academie-sciences.fr/chimie/article/10.1016/j.crci.2016.11.006/file/attach/mmc1.pdf)

## **Supporting Information for:**

# **Metallation–Substitution of an $\alpha$ -Oxygenated Chiral Nitrile**

Madeha R. Alshawish, Graeme Barker, Nicholas D. Measom and Iain Coldham\*

*Department of Chemistry, University of Sheffield, Brook Hill, Sheffield S3 7HF, U.K.*

### **Contents**

1.  $^1\text{H}/^{13}\text{C}$  NMR spectra of novel compounds S-2

1.  $^1\text{H}/^{13}\text{C}$  NMR spectra of novel compounds

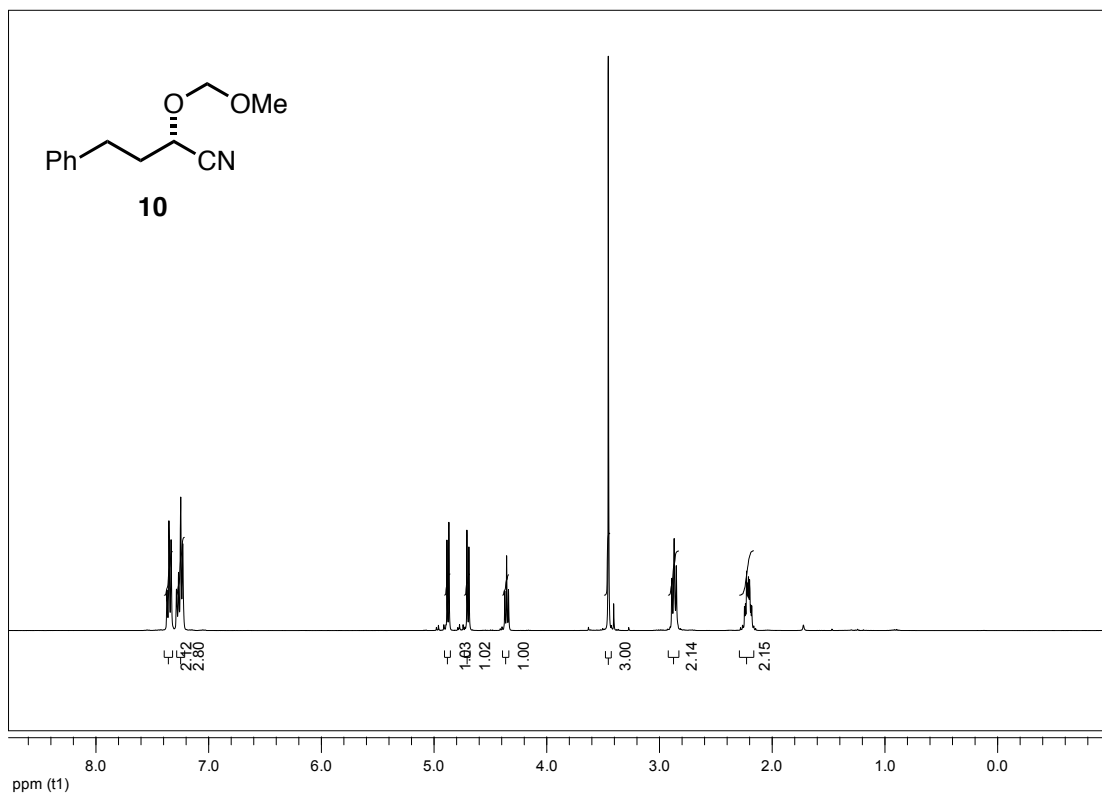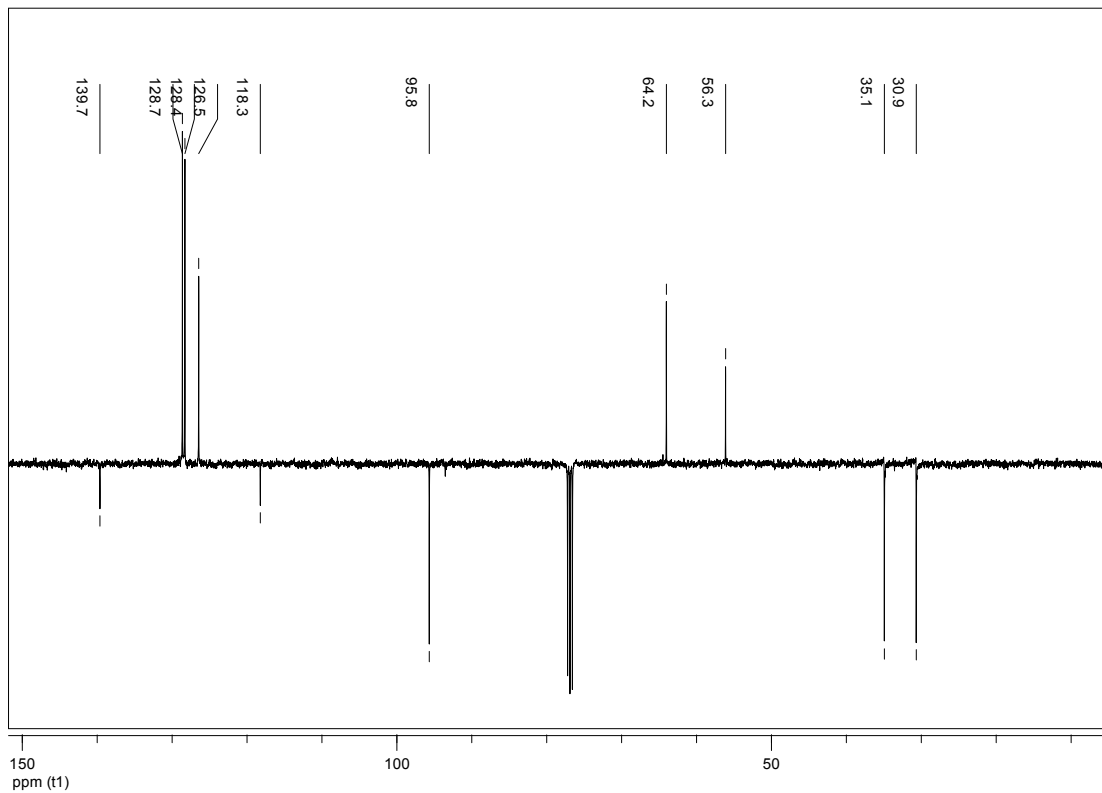

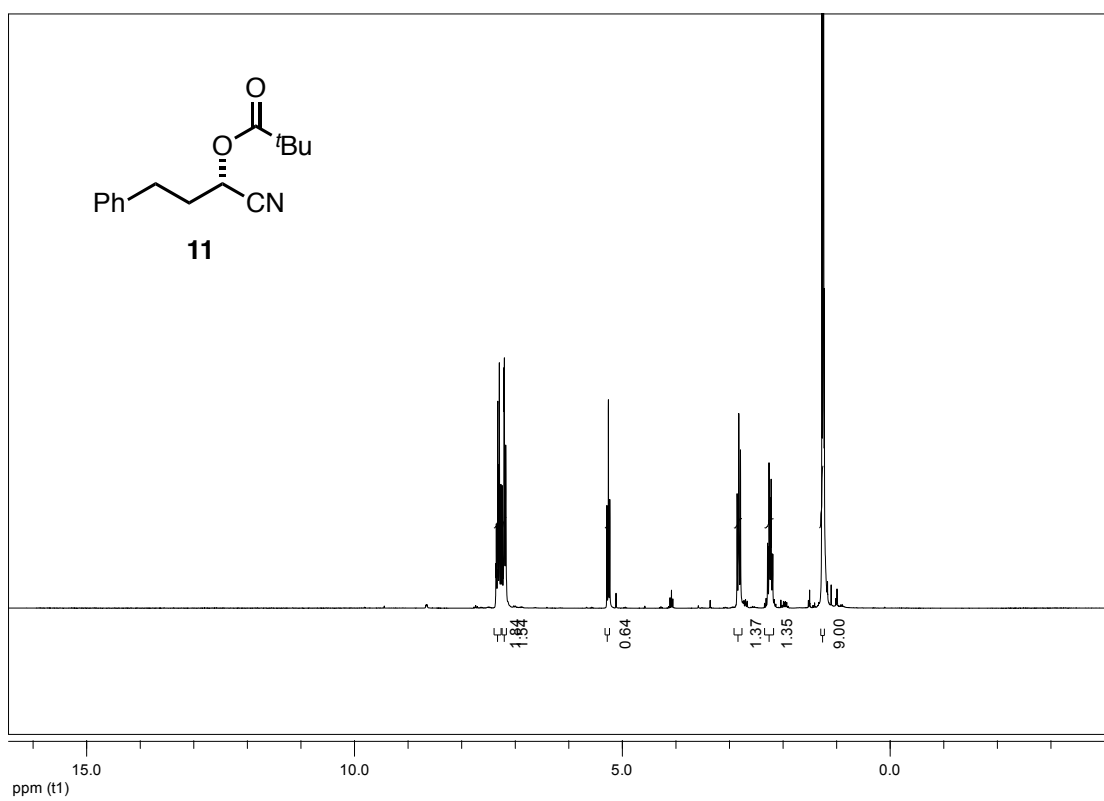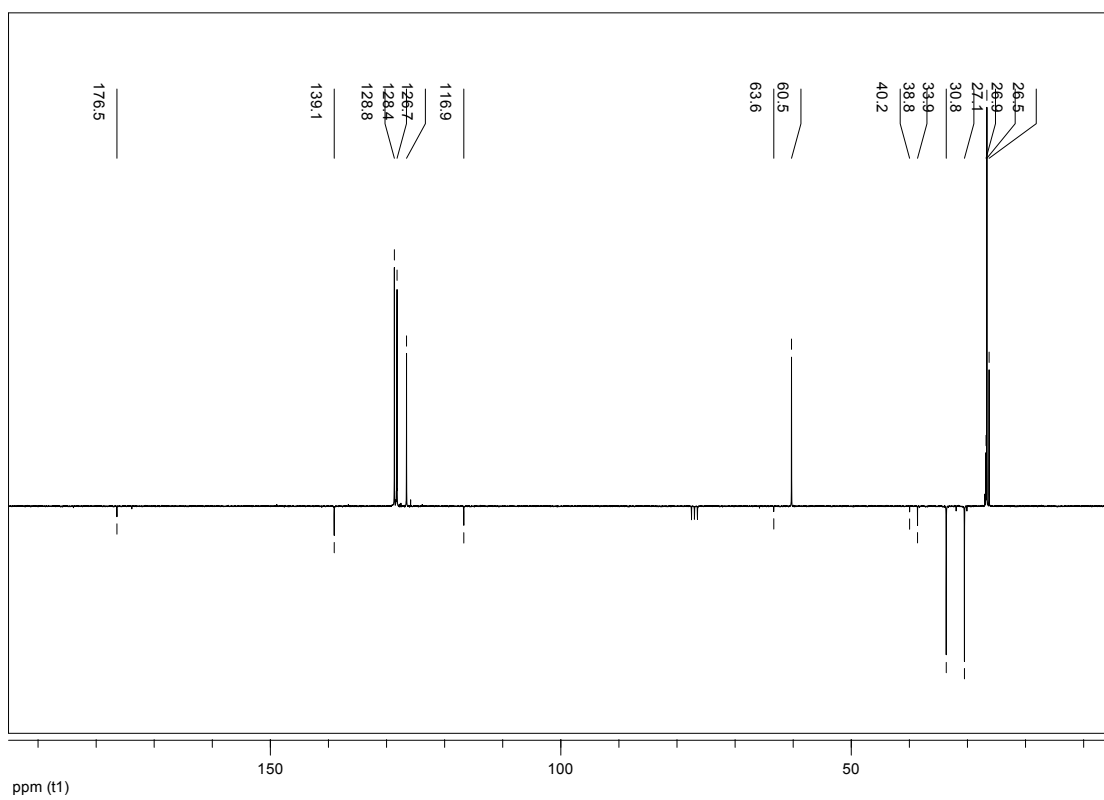

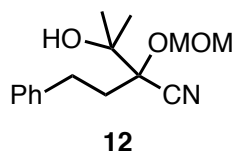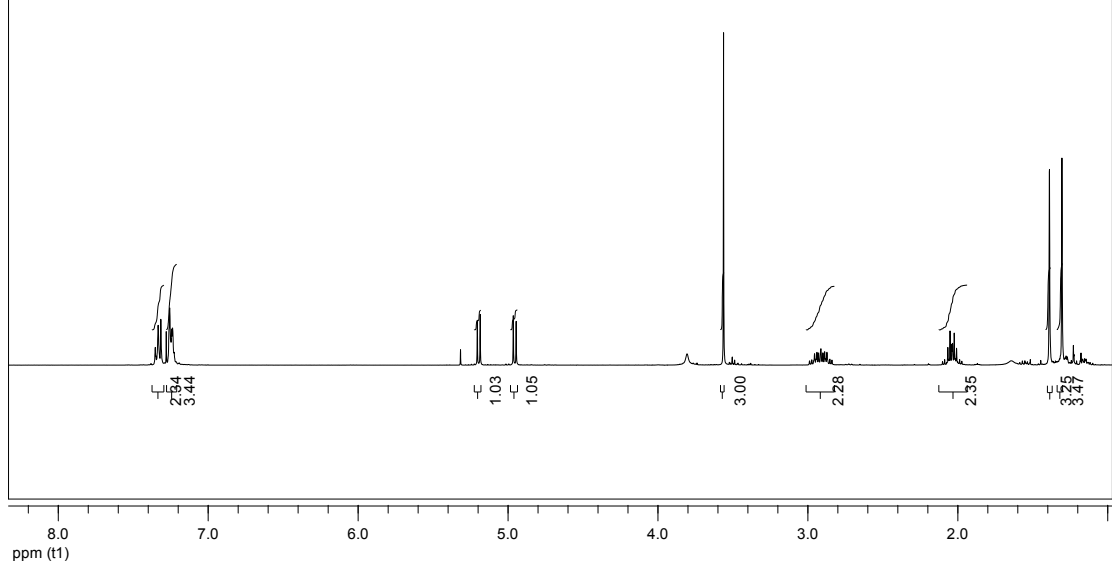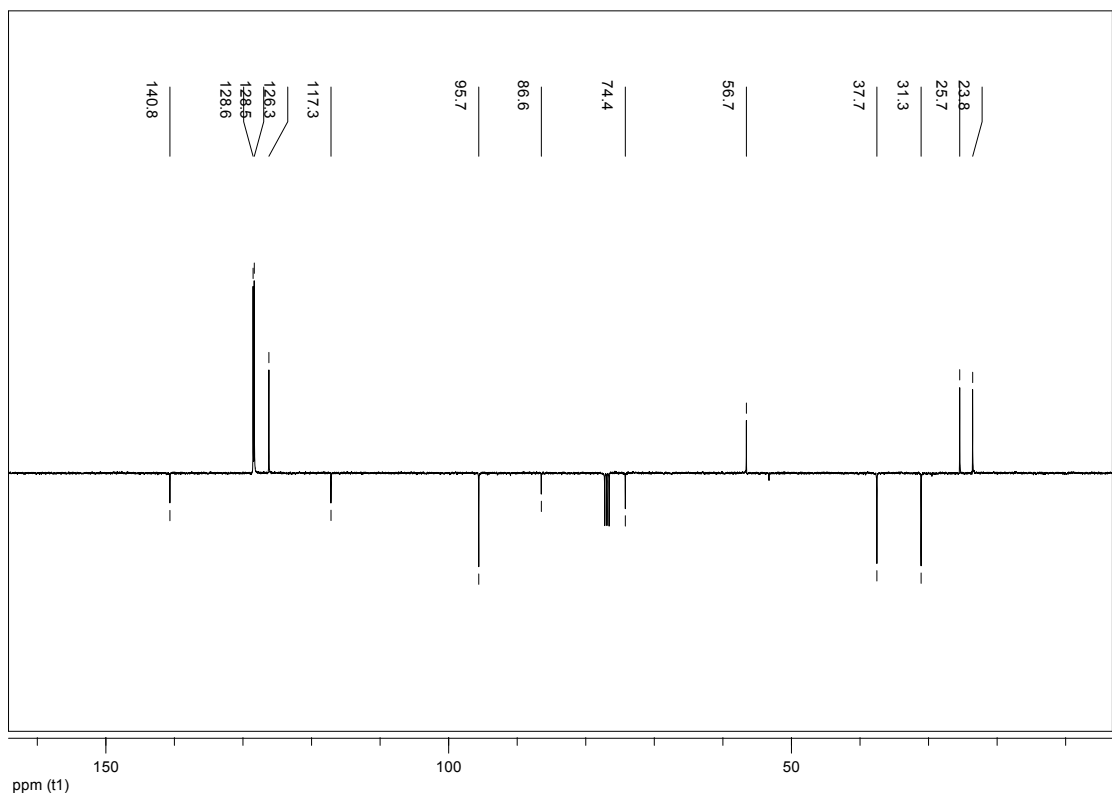

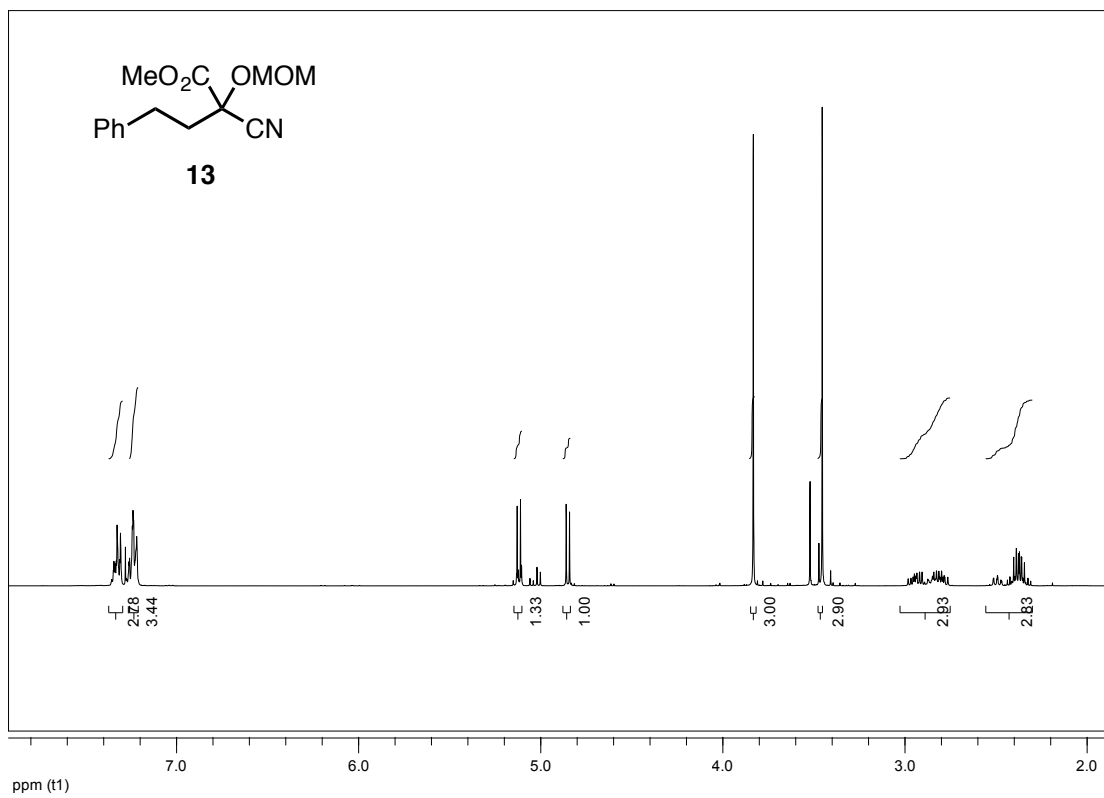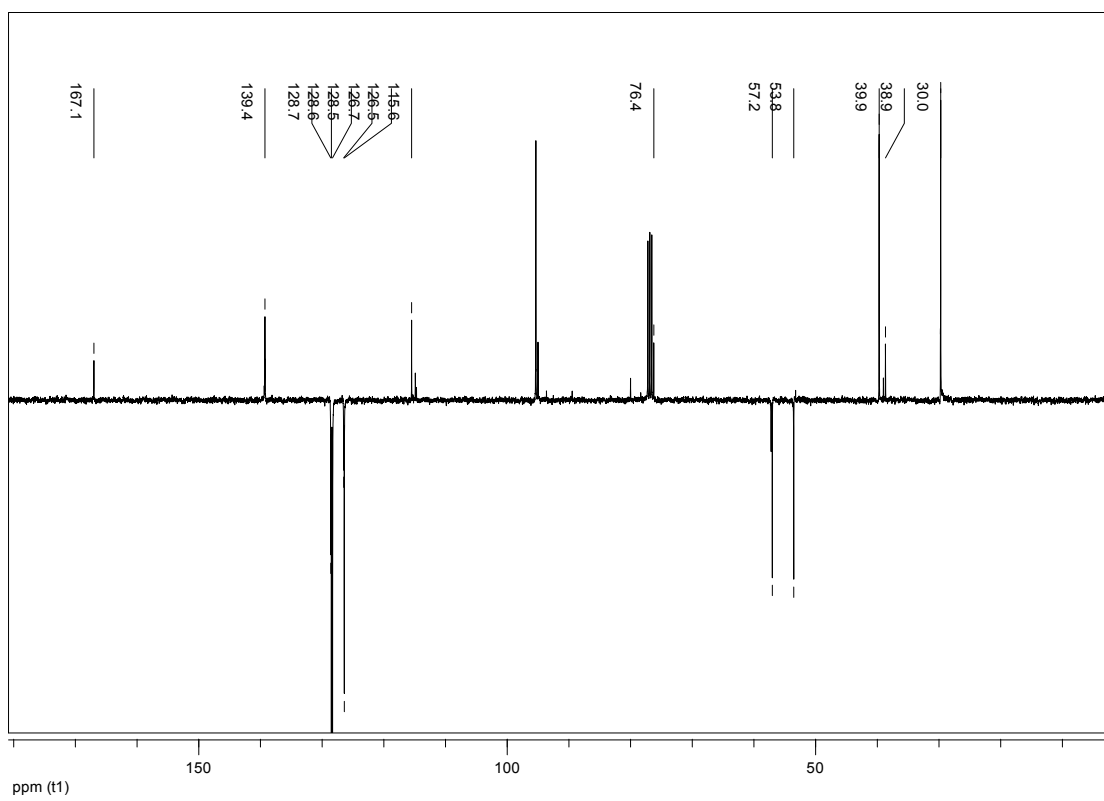

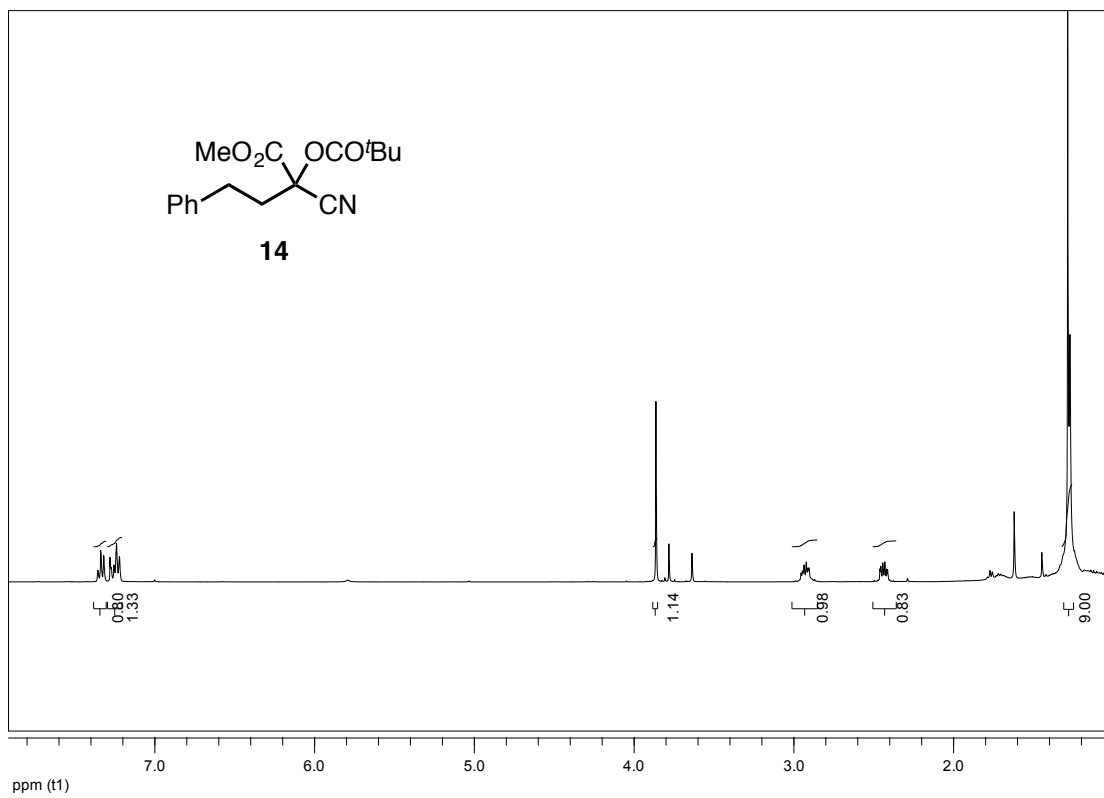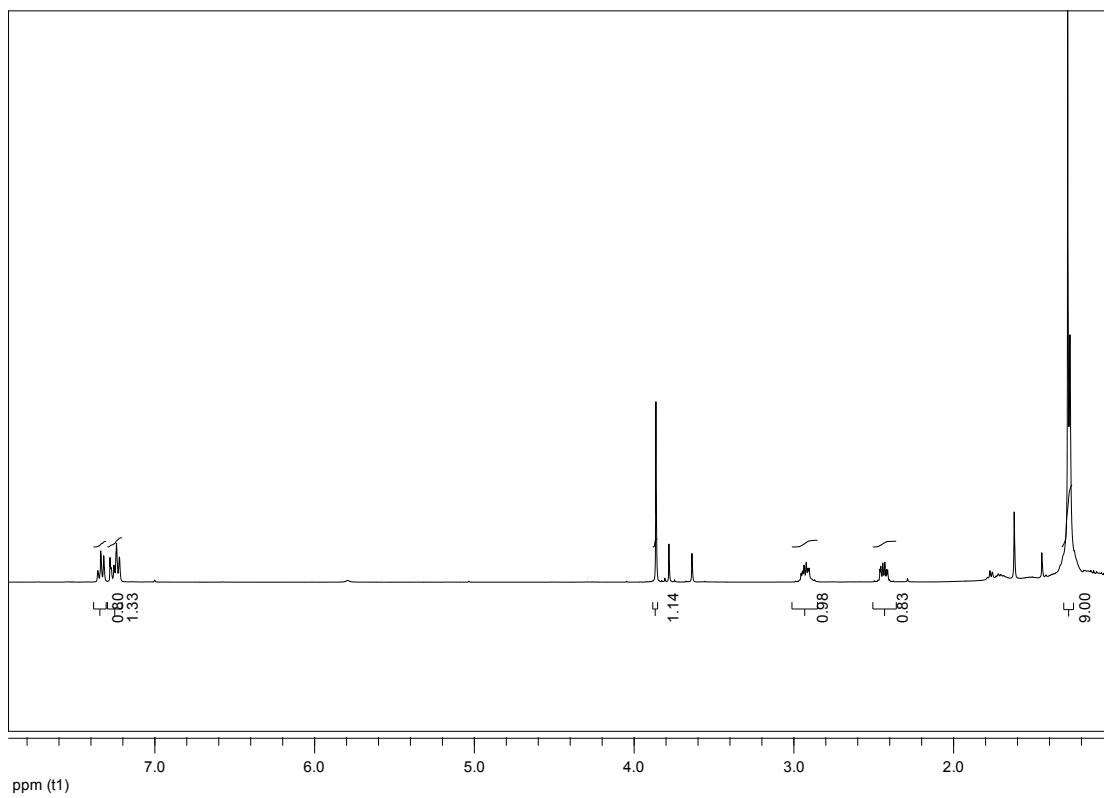



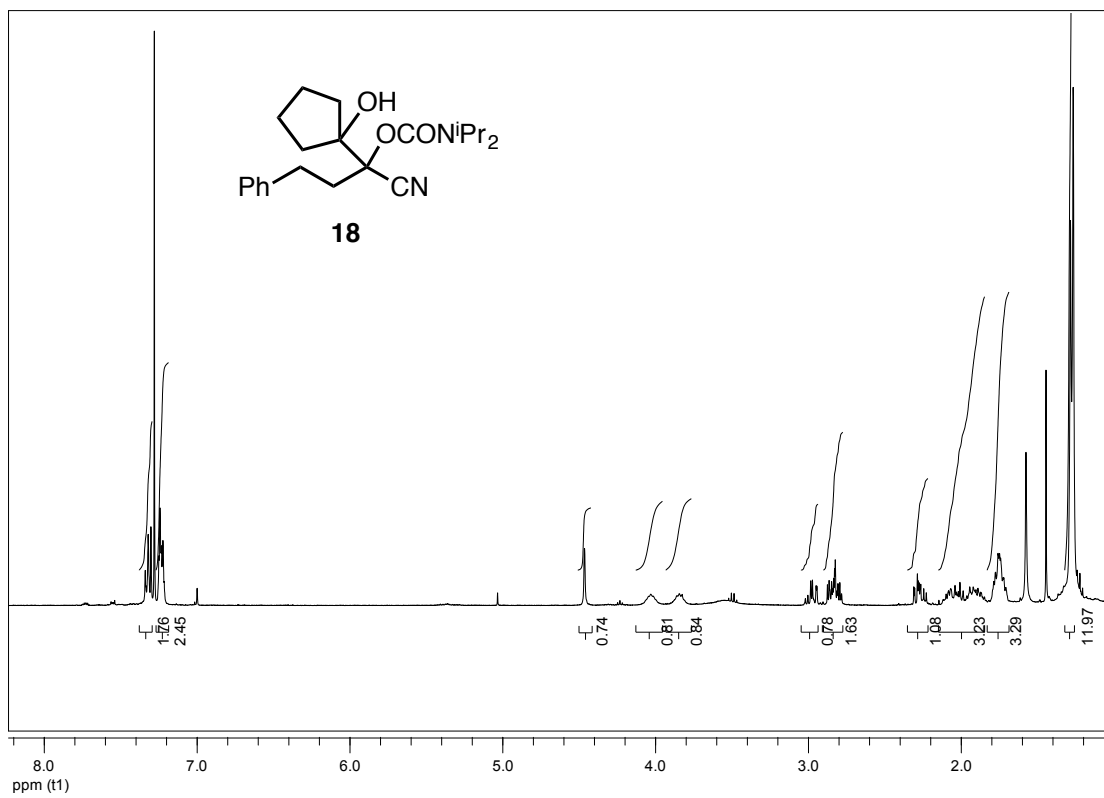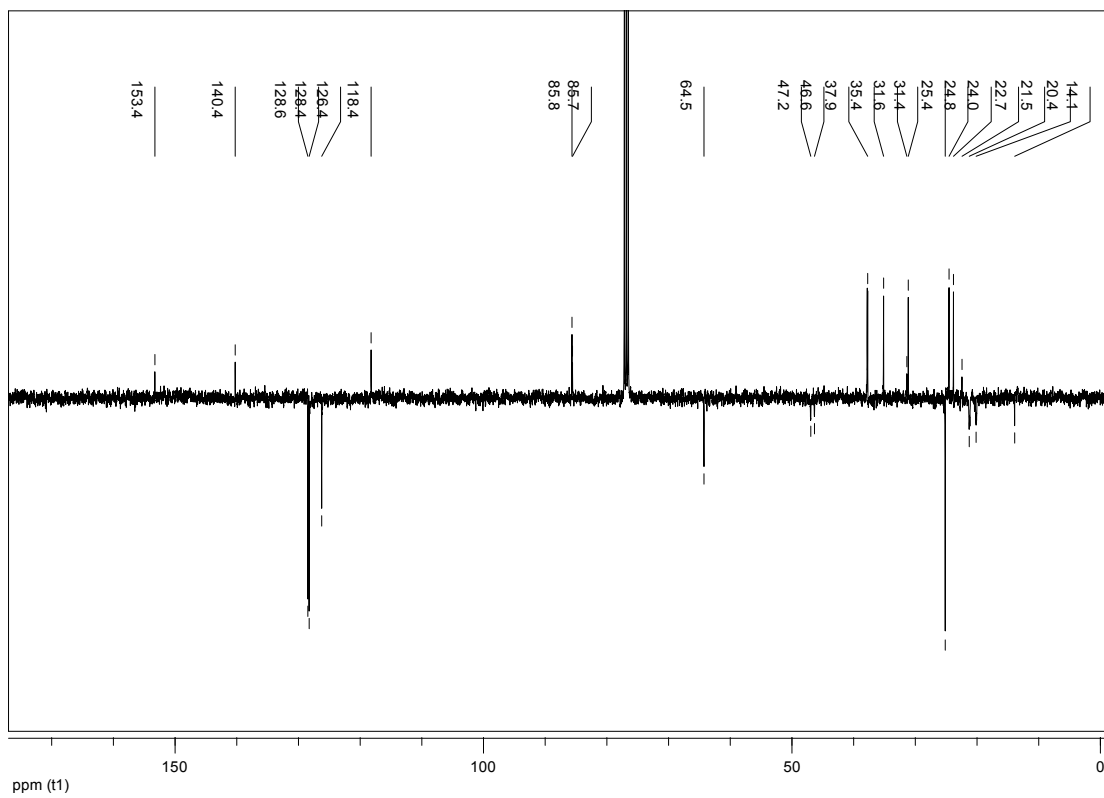



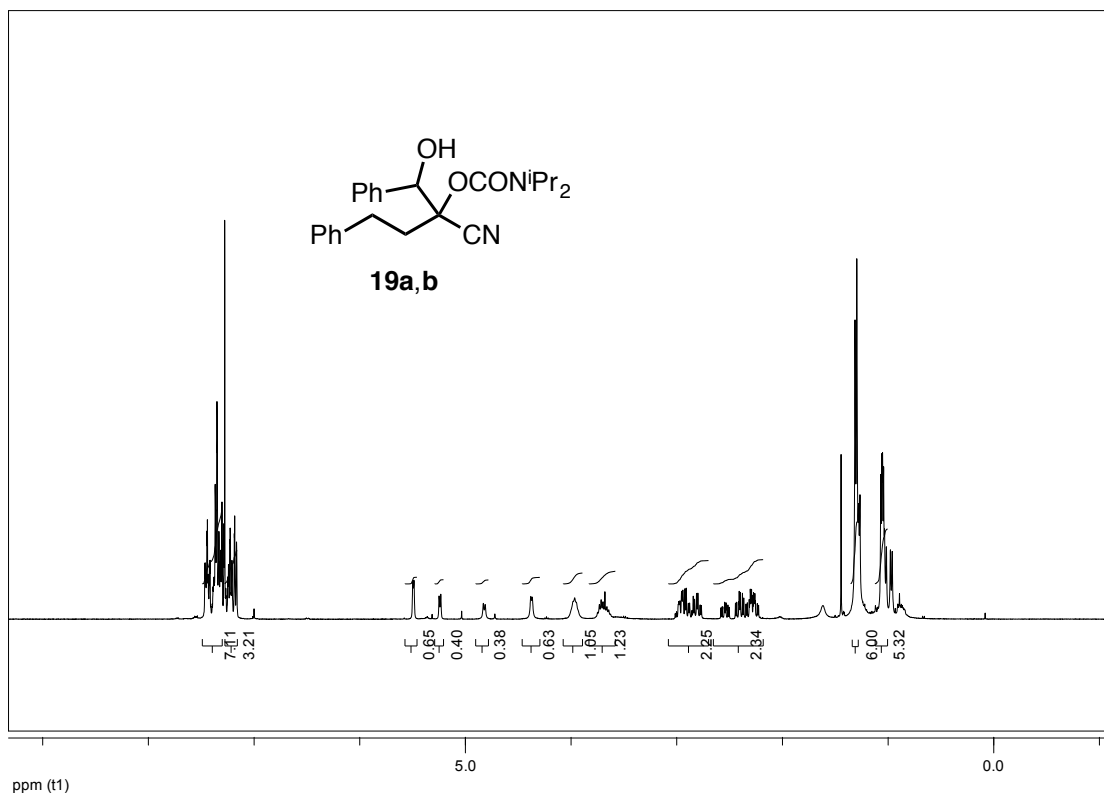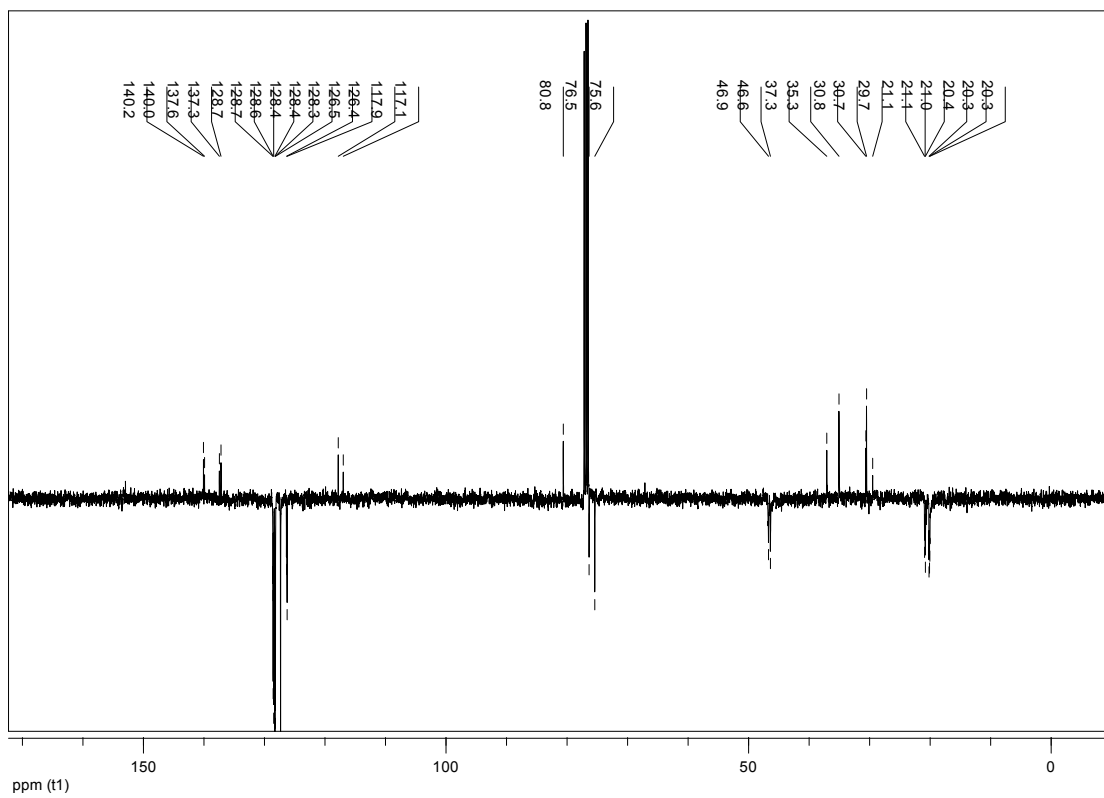

Supplement: mmc1 [file mmc1.pdf]
